# Supplementary material
Source: PubMed Central journal article supplement (PMC8574135)
Supplement: NIHMS1750090-supplement-published_supplement.pdf [file NIHMS1750090-supplement-published_supplement.pdf]

# Supplemental Information

## SECTION 1: COLORADO VSM RECRUITMENT PROTOCOL

Participants were recruited for the VSM trial from September 2013 to October 2015. Pregnant women were eligible to participate in the study. Recruitment was conducted in waves. Eligible participants were identified by using the electronic medical record every 6 weeks. The following inclusion criteria were used to identify eligible patients:

- Currently pregnant with a diagnosis of pregnancy (*International Classification of Diseases, Ninth Revision, Clinical Modification* codes V22 and V23) in the obstetrics and gynecology department (outpatient) within the last 10 months;
- At least 1 diagnosis of pregnancy in the past 2 months;
- Thirteen to 6 weeks from the expected date of delivery;
- Currently enrolled in KPCO;
- At least 18 years of age or older; and
- English speaking.

Pregnant participants were identified in the third trimester of pregnancy to reduce the possibility of recruitment of women experiencing pregnancy complications or abortion decisions. We also chose a time later in pregnancy when the decisions for the expectant child were more relevant.

Using medical diagnosis codes from the electronic medical record, we identified potential participants from the eligibility list with possible pregnancy complications,

including early delivery, fetal death, adoption, abortion, and genetic anomalies. Medical record reviews were conducted for each identified potential participant. Any potential participant with the following outcomes was determined ineligible for the study and was not included in recruitment:

1. Fetal death;
2. Miscarriage;
3. Plans for adoption;
4. Fetal genetic malformation; and
5. Social issues (such as abuse).

### Recruitment Methods

Potential participants were contacted in a multistep process by mail, e-mail, and phone by using a modification of the Dillman method.<sup>39,40</sup> Each form of contact has the objective of informing potential participants about the study, inviting them to participate, and providing instructions about how to enroll in the study or how to decline participation in the study. They were contacted via mail, e-mail, phone, and text messages. To reinforce recruitment, posters and postcards describing the study were available in all obstetrics and gynecology and pediatrics departments at KPCO.

Participants were enrolled in the study by using an online consenting process. In the recruitment materials, participants were provided a link to the study Web site. Once on the study Web site, enrollment in the study occurred in a 5-step process: identity verification, eligibility determination, consent, user account creation, and survey completion.

### Online Enrollment Steps

#### *Enrollment Step 1: Identity Verification*

The study enrollment page prompted each participant to enter his or her last name and the last 4 digits of his or her Kaiser Permanente medical record number. This information was matched to an unidentifiable combination of these letters and numbers and was used to verify the identity of the participant. This process removed the need for identifiable patient information to be stored on the Web site while providing an opportunity to verify participants' identities.

#### *Enrollment Step 2: Eligibility Determination*

After identity verification, participants were asked to confirm eligibility. Eligibility requirements included being 18 years of age or older and planning to use a Kaiser provider for the child's medical care.

#### *Enrollment Step 3: Consent*

Participants determined to be eligible in Step 2 were provided the study consent form online. They were asked to read and agree to the terms described in the consent form. They were also provided with the study team's contact information (phone and e-mail) to address any questions.

#### *Enrollment Step 4: Create a User Account*

Participants who selected, "I agree to the terms of the consent" in Step 3 consented to the study and were asked to create a user account for the Web site. The user account required an e-mail, username, and password. A unique study ID for each individual

**SUPPLEMENTAL TABLE 5** Section 2: Colorado VSM Study Content Mapping to Theoretic Constructs

| Colorado VSM Web Site Content | Health Belief Model      |                    |                    |                    | Theory of Planned Behavior |          |                 |                   |
|-------------------------------|--------------------------|--------------------|--------------------|--------------------|----------------------------|----------|-----------------|-------------------|
|                               | Perceived Susceptibility | Perceived Severity | Perceived Benefits | Perceived Barriers | Self-efficacy              | Attitude | Subjective Norm | Perceived Control |
| Vaccine-preventable diseases  | x                        | x                  | x                  | —                  | —                          | x        | —               | —                 |
| Vaccine safety                | x                        | x                  | —                  | x                  | —                          | x        | —               | —                 |
| Vaccine laws                  | —                        | —                  | —                  | —                  | x                          | x        | x               | x                 |
| Recommended vaccine schedule  | —                        | —                  | —                  | —                  | x                          | —        | x               | x                 |
| Vaccine visit information     | —                        | —                  | —                  | —                  | x                          | —        | —               | x                 |
| Vaccine ingredients           | x                        | —                  | —                  | x                  | —                          | x        | —               | x                 |
| Vaccine development           | —                        | —                  | x                  | —                  | —                          | x        | —               | x                 |
| Basic immunology              | x                        | x                  | x                  | —                  | —                          | x        | —               | —                 |
| Discussion forum <sup>a</sup> | —                        | —                  | —                  | —                  | x                          | —        | x               | x                 |
| Blog <sup>a</sup>             | —                        | —                  | —                  | —                  | x                          | —        | x               | x                 |
| Chat <sup>a</sup>             | —                        | —                  | —                  | —                  | x                          | —        | x               | x                 |
| Ask a question <sup>a</sup>   | —                        | —                  | —                  | —                  | x                          | —        | —               | x                 |

x, theoretic construct applies to the content area; —, not applicable.

<sup>a</sup> The social interaction addressed theoretical constructs specific to each individual question. However, the goal of the social interaction was to empower participants.

was linked to the user account information.

### *Enrollment Step 5: Survey Completion*

After creating a user account, participants were asked to complete a survey. At survey completion, participants were randomly assigned into a study arm and enrolled in the study.

Each participant received a \$20 gift card for completing the survey and enrolling in the study.

**SUPPLEMENTAL TABLE 6** Theoretical Construct Definitions

| Health Belief Model                                                        | Definition                                                                                                      |
|----------------------------------------------------------------------------|-----------------------------------------------------------------------------------------------------------------|
| Perceived susceptibility of vaccine-preventable disease and adverse events | Parents' beliefs about whether their children are at risk for vaccine-preventable disease and adverse events    |
| Perceived severity of vaccine-preventable diseases and adverse events      | Parents' opinions regarding the seriousness of vaccine-preventable disease and adverse events                   |
| Perceived benefits of vaccinating                                          | Parents' perception of effectiveness of vaccines                                                                |
| Perceived barriers to vaccinating                                          | Parents' perception of physical and psychological costs of vaccination                                          |
| Vaccinating self-efficacy                                                  | Parents' belief in their ability to overcome barriers to vaccination                                            |
| Theory of Planned Behavior                                                 |                                                                                                                 |
| Attitudes about vaccinating                                                | Parents' positive or negative feelings about vaccinating when considering the potential outcomes to vaccinating |
| Subjective norms about vaccinating                                         | Parents' beliefs that others do or do not vaccinate or motivations to comply with societal expectations         |
| Perceived control about vaccinating decision                               | Parents' perceived ease or difficulty to vaccinate and how much control they have over the act of vaccination   |

## SECTION 3: WEB SITE VISUALS

Site Expectations My Profile | Log out

Here for your child's health, day and night.

**VACCINE RESOURCE CENTER**

Home All About Vaccines Your Vaccine Visit Connect FAQs About Us Contact Us

**Do you know what to expect at your visit?**

[Your Vaccine Visit](#)

**Your Vaccine Visit**

- Your Vaccine Visit
- Vaccination Schedule
- Alternative Vaccination Schedules

**Vaccines & Diseases they Prevent**

- Vaccines and Vaccine Preventable Diseases
- Vaccine Schedule

**Vaccine Safety**

- Vaccine Safety
- Vaccine Ingredients
- FAQs

**Maternal Vaccination**

- Maternal Immunizations
- FAQs

**School & Child Care Policies**

- Colorado School & Childcare Requirements
- Vaccine History

[Ask a Question](#) [Talk to Parents](#)

**Latest From The Blog**

**Back to School: CO Vaccination Rates**  
July 28th, 2016

As summer winds down in CO and families get ready to send their child(ren) [...]

**New Colorado Vaccine Exemption Rule Took Effect**  
7/1/16  
July 12th, 2016

In April 2014, the Colorado House and Senate passed House Bill 1288 which changed [...]

**You Asked Us: How Effective is Rotavirus Vaccine?**  
June 21st, 2016

Q: Hi, I had a question about the rotavirus vaccine. In the description, it [...]

**SUPPLEMENTAL FIGURE 2**

Colorado VSM study Web site visuals from September 2013 to December 2016. Home page.

Site Expectations
My Profile | Log out


Here for your child's health, day and night.

[Home](#) | [All About Vaccines](#) | [Your Vaccine Visit](#) | [Connect](#) | [FAQs](#) | [About Us](#) | [Contact Us](#)

---

### All About Vaccines

- [All About Vaccines](#)
- [Vaccine Safety](#)
- [Vaccine Science](#)
- [Vaccines and Vaccine Preventable Diseases >](#)
- [Vaccine Ingredients Table](#)
- [Vaccine Laws](#)
- [Additional Resources](#)
- [Glossary](#)



**Ask a Question**



**Talk to Parents**

Popular
Recent



**Back to School: CO Vaccination Rates**  
July 28th, 2016



**Part II: Top 10 Flu Vaccine Questions and Answers**  
October 8th, 2015



**Top 10 Flu Vaccine Questions and Answers**  
October 1st, 2015

## All About Vaccines



### Vaccine Laws

- Colorado requirements
- Why we have mandates
- Vaccine legal history

[Learn More >](#)



### Vaccine Safety

- Checking Vaccine Safety
- Adverse Event Reporting
- Studying Vaccine Safety

[Learn More >](#)



### Vaccine Science

- How Vaccines Work
- Types of Vaccines
- Vaccine Ingredients
- How Vaccines are Made

[Learn More >](#)



### Vaccines & Diseases they Prevent

- Vaccines & Vaccine Preventable Diseases
- Which Vaccines are used at KPCCO

[Learn More >](#)

### Latest From The Blog



**Back to School: CO Vaccination Rates**  
July 28th, 2016

As summer winds down in CO and families get ready to send their child(ren) [...]



**New Colorado Vaccine Exemption Rule Took Effect 7/1/16**  
July 12th, 2016

In April 2014, the Colorado House and Senate passed House Bill 1288 which changed [...]



**You Asked Us: How Effective is Rotavirus Vaccine?**  
June 21st, 2016

Q: Hi, I had a question about the rotavirus vaccine. In the description, it [...]

**SUPPLEMENTAL FIGURE 3**

Colorado VSM study Web site visuals from September 2013 to December 2016. Content page: Navigation.

Site Expectations My Profile | Log out

Here for your child's health, day and night.



[Home](#)   [All About Vaccines](#)   [Your Vaccine Visit](#)   [Connect](#)   [FAQs](#)   [About Us](#)   [Contact Us](#)

---

[Home](#) / [All About Vaccines](#) / [Vaccines and Vaccine Preventable Diseases](#) / [Hep A \(Hepatitis A\)](#)

## Hep A (Hepatitis A)

|                                             |
|---------------------------------------------|
| All About Vaccines                          |
| Vaccine Safety                              |
| Vaccine Science                             |
| Vaccines and Vaccine Preventable Diseases > |
| DTaP (Diphtheria, Tetanus, Pertussis)       |
| Hep A (Hepatitis A)                         |
| Hep B (Hepatitis B)                         |
| Hib (Haemophilus type B)                    |
| HPV (Human Papillomavirus)                  |
| IV or LAIV (Influenza or Flu)               |
| IPV (Polio)                                 |
| MCV (Meningococcal)                         |
| MMR (Measles, Mumps, Rubella)               |
| PCV (Pneumococcal)                          |
| RV (Rotavirus)                              |
| VAR (Varicella or Chicken Pox)              |
| Vaccine Ingredients Table                   |
| Vaccine Laws                                |
| Additional Resources                        |
| Glossary                                    |

## Hep A (Hepatitis A)

| Summary                                                                                                                                                                                                                                                                                                                                                                                                                                                                                                                                                                                                                                                                                                                                                                                                                                                                                                                                                                                                                                                                                                                                                                                                                                                                                                                                                                                                   | Disease | Vaccine | Side Effects | Kaiser Vaccines |
|-----------------------------------------------------------------------------------------------------------------------------------------------------------------------------------------------------------------------------------------------------------------------------------------------------------------------------------------------------------------------------------------------------------------------------------------------------------------------------------------------------------------------------------------------------------------------------------------------------------------------------------------------------------------------------------------------------------------------------------------------------------------------------------------------------------------------------------------------------------------------------------------------------------------------------------------------------------------------------------------------------------------------------------------------------------------------------------------------------------------------------------------------------------------------------------------------------------------------------------------------------------------------------------------------------------------------------------------------------------------------------------------------------------|---------|---------|--------------|-----------------|
| <h3>Summary</h3> <p>Hepatitis A is a virus that affects the function of your liver. It is spread through contact with stool of a person infected with the disease. About 1 in 5 people with Hepatitis require hospitalization to treat the infection. The vaccination is an inactivated (dead) virus vaccine that is generally given in (2) shots to children between 1 to 2 years old. Visit the vaccine schedule.</p> <p>The most common side effect of the vaccine is a sore arm at the injection site.</p> <p><b>The Hep A Vaccine at Kaiser Permanente Colorado</b></p> <p>Kaiser Permanente most commonly gives Hep A vaccine to infants using the Havrix vaccine. For a full list of all the vaccines given at Kaiser Permanente Colorado and their ingredients, please visit the <a href="#">Vaccine Ingredients Table</a>.</p> <div style="border: 1px solid #ccc; padding: 10px; margin-top: 10px;"> <h4>Special Cases</h4> <h5>Who Shouldn't Get the Vaccine</h5> <ul style="list-style-type: none"> <li>▶ Children who have ever had a serious allergic reaction to a previous dose of Hep A vaccine</li> <li>▶ Children who have had a severe allergic reaction to any of the ingredients in Hep A vaccine</li> <li>▶ Children with moderate or severe illnesses that are sudden and intense, but goes away should wait to get the vaccine until they are over the illness</li> </ul> </div> |         |         |              |                 |

## Where did the information on this page come from?

Sources

## Latest From The Blog

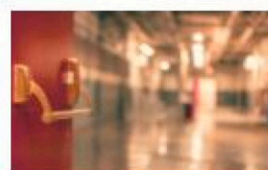

Back to School: CO Vaccination Rates  
July 28th, 2016

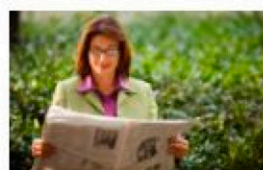

New Colorado Vaccine Exemption Rule  
Took Effect 7/1/16  
July 12th, 2016

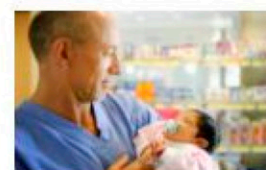

You Asked Us: How Effective is  
Rotavirus Vaccine?  
June 21st, 2016

## SUPPLEMENTAL FIGURE 4

Colorado VSM study Web site visuals from September 2013 to December 2016. Content page: Vaccines and vaccine preventable diseases (hepatitis A).

Site Expectations
My Profile | Log out



Here for your child's health, day and night.

[Home](#)
[All About Vaccines](#)
[Your Vaccine Visit](#)
[Connect](#)
[FAQs](#)
[About Us](#)
[Contact Us](#)

## Childhood Vaccination

Home / Your Vaccine Visit / Childhood Vaccination

Your Vaccine Visit

Childhood Vaccination

Maternal Vaccination

Teen | Adult Vaccination

Travel Vaccination

Vaccine Schedule




## Childhood Vaccinations

Summary
Before the Visit
At the Visit
After the Visit
At Home

### During the Appointment | Tips for parents during vaccination

Vaccines may hurt a little and your baby might cry for a few minutes. The unfamiliar surroundings of the doctor's office may also make your baby feel uncomfortable. Here are some tips for keeping your little one calm and secure during his or her vaccinations:

- Talk to your baby in a soft and calm voice
- Touch your baby
- Smile at your baby and make eye contact
- Bring a rattle and shake it to distract your baby
- Hold your baby in their favorite blanket

Where did the information on this page come from?

+ Sources

### Latest From The Blog



Back to School: CO Vaccination Rates



New Colorado Vaccine Exemption Rule



You Asked Us: How Effective is

**SUPPLEMENTAL FIGURE 5**  
 Colorado VSM study Web site visuals from September 2013 to December 2016. Content page: Vaccine visit information.

Site Expectations
My Profile | Log out


Here for your child's health, day and night.

[Home](#)   [All About Vaccines](#)   [Your Vaccine Visit](#)   [Connect](#)   [FAQs](#)   [About Us](#)   [Contact Us](#)

## FAQs

Home / FAQs

FAQs

FAQs about Vaccines

FAQs about Vaccines and Diseases

Vaccine Ingredients >



**Ask a Question**



**Talk to Parents**

Popular
Recent



**Back to School: CO Vaccination Rates**  
July 28th, 2016



**Part II: Top 10 Flu Vaccine Questions and Answers**  
October 8th, 2015



**Top 10 Flu Vaccine Questions and Answers**  
October 1st, 2015

### FAQs about Vaccines

- + I've been told infants have natural immunity. Is this true?
- + I thought many of these diseases were starting to disappear before vaccines were introduced?
- + If a disease is rare, why should my child get vaccinated against it?
- + Can my child get the disease from the vaccine?
- + Can my child get a disease after he/she is vaccinated?
- + During outbreaks, aren't a majority of the people that get sick vaccinated?
- + Why is Hep B vaccine given to babies when most of them won't be exposed to the disease until adulthood?
- + Does my KPCO doctor get paid to vaccinate my child?
- + Will this many vaccines be too much for my baby's immune system?
- + Do pharmaceutical companies make a lot of money from producing vaccines?

### FAQs about Vaccines and Diseases

- + Is there a connection between autism and the MMR vaccine??
- + What is autism?
- + Is there a connection between diabetes and vaccines?
- + What is HPV and who should get the HPV vaccine?
- + Is there a connection between Sudden Infant Death Syndrome (SIDS) and vaccines?

**SUPPLEMENTAL FIGURE 6**

Colorado VSM study Web site visuals from September 2013 to December 2016. Content page: Frequently asked questions.

Your Vaccine Visit

Childhood Vaccination

Maternal Vaccination

Teen | Adult Vaccination

Travel Vaccination

Vaccine Schedule

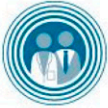

Ask a Question

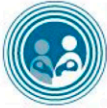

Talk to Parents

Popular

Recent

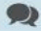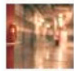

Back to School: CO Vaccination Rates

July 28th, 2016

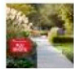

Part II: Top 10 Flu Vaccine Questions and Answers

October 8th, 2015

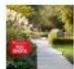

Top 10 Flu Vaccine Questions and Answers

October 1st, 2015

## Vaccine Schedule

| Recommended Vaccine Schedule                                                                                                                                                                                                                                                                                                                                                                                 | Who Makes the Vaccine Schedule | Alternative Schedules |
|--------------------------------------------------------------------------------------------------------------------------------------------------------------------------------------------------------------------------------------------------------------------------------------------------------------------------------------------------------------------------------------------------------------|--------------------------------|-----------------------|
| + At Birth   Hepatitis B*                                                                                                                                                                                                                                                                                                                                                                                    |                                |                       |
| + 1-2 Months   Hepatitis B*                                                                                                                                                                                                                                                                                                                                                                                  |                                |                       |
| + 2 Months   Hepatitis B*, Rotavirus, DTaP, Hib, Pneumococcal, Polio                                                                                                                                                                                                                                                                                                                                         |                                |                       |
| - 4 Months   Hepatitis B*, Rotavirus, DTaP, Hib, Pneumococcal, Polio                                                                                                                                                                                                                                                                                                                                         |                                |                       |
| <p><b>2nd of 3 doses: Hepatitis B (Hep B) <i>Pediarix</i></b><br/>           This is the Hep B combination vaccine. It is given at 2 months, 4 months, and 6 months. The vaccine protects against Hep B, Polio, Tetanus, Pertussis and Diphtheria.</p> <p><i>*Your baby may receive 3 or 4 doses of Hep B vaccine based on which vaccine your baby is given.</i></p>                                         |                                |                       |
| <p><b>2nd of 3 doses: Rotavirus (RV)</b><br/>           This is the Rotavirus vaccine and infants usually receive three doses (oral) of RV at 2 months, 4 months, and 6 months.</p>                                                                                                                                                                                                                          |                                |                       |
| <p><b>2nd of 5 doses: Diphtheria, Tetanus, and acellular Pertussis (DTaP)</b><br/>           The DTaP vaccine protects against Diphtheria, Tetanus and Pertussis. It is often given in combination with Hep B and IPV vaccine. Children receive (5) shots (doses) of DTaP in their first 6 years of life. Doses are recommended at 2 months, 4 months, 6 months, 15-18 months and between 4-6 years old.</p> |                                |                       |
| <p><b>2nd of 3/4 doses: Haemophilus influenza b (Hib)</b><br/>           This is the Haemophilus influenza B vaccine and protects against Haemophilus influenzae type B bacteria. Four doses of Hib vaccine are recommended within the first 18 months of life. Children normally receive the doses at 2 months, 4 months, 6 months and 12 months of age.</p>                                                |                                |                       |
| <p><b>2nd of 4 doses: Pneumococcal vaccine (PCV)</b><br/>           This is the Pneumococcal vaccine and protects against the streptococcus pneumoniae bacteria. Children typically receive 4 doses of the vaccine, at 2 months, 4 months, 6 months and 12 months, before they are 18 months old.</p>                                                                                                        |                                |                       |
| <p><b>2nd of 4 doses: Polio vaccine (IPV)</b><br/>           This is the Inactivated Polio vaccine (IPV) and protects against the polio virus. It is often given in combination with Hep B and DTaP vaccine. Children typically receive 4 doses of IPV in the first 6 years of life. Doses are recommended at 2 months, 4 months, 6 months to 18 months, and 4 to 6 years of age.</p>                        |                                |                       |
| + 6 Months   Hepatitis B*, Rotavirus, DTaP, Hib, Pneumococcal, Polio, Flu                                                                                                                                                                                                                                                                                                                                    |                                |                       |

### SUPPLEMENTAL FIGURE 7

Colorado VSM study Web site visuals from September 2013 to December 2016. Content page: Childhood vaccine schedule.



**VACCINE RESOURCE CENTER**

Here for your child's health, day and night.

Home All About Vaccines Your Vaccine Visit Connect FAQs About Us Contact Us

Ask a Question Home / Connect / Ask a Question

Connect

Website Expectations

Ask a Question

Blog

Chat With an Expert

Talk with Other Parents

**Ask a Question** **Talk to Parents**

Popular Recent

 Back to School: CO Vaccination Rates  
July 28th, 2016

 Part II: Top 10 Flu Vaccine Questions and Answers  
October 8th, 2015

 Top 10 Flu Vaccine Questions and Answers  
October 1st, 2015

## Ask a Question

We've done our best to give you all the information that we can...but we know we might not have covered it all. Whenever questions come up, we're here to answer them. Our doctors and vaccine experts will have an answer for you within two to three days and possibly post your question and answer on the discussion forum.

Also, we are always looking for ways to improve this site as a resource for parents like you. Please send us your thoughts, feedback, or additional vaccine topics you would like us to provide more information about.

If you have any specific questions or concerns about your child's health, please contact your healthcare provider.

*Example of a question we will gladly answer:*  
"My child is due for the chickenpox vaccine, what vaccine does KPCO give for chickenpox?"

*Example of a question we'll refer you back to your doctor to answer:*  
"My child has a history of febrile seizures, should I be concerned about my child getting vaccinated?"

As always, if you feel someone isn't following site expectations or is simply making you uncomfortable, please contact us.

Your User Name (required)

Your Email (required)

Subject

Your Message

**SUPPLEMENTAL FIGURE 8**

Colorado VSM study Web site visuals from September 2013 to December 2016. Interactive page: Ask a question.

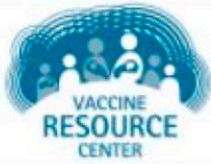

Here for your child's health, day and night.

- Home
- All About Vaccines
- Your Vaccine Visit
- Connect
- FAQs
- About Us
- Contact Us

## Chat With an Expert

Home / Connect / Chat With an Expert

- Connect
- Website Expectations
- Ask a Question
- Blog
- Chat With an Expert
- Talk with Other Parents

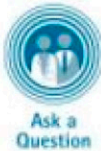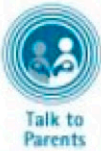

## Chat with an Expert

We'll be hosting a series of chats with individuals who bring a variety of vaccine expertise to the table. These chat sessions will be open to any member who is interested in talking with us about vaccine-related topics.

You can chat with our experts in one of three ways.

- **Once a month chat sessions:** These chat sessions will be open to everyone in the Vaccine Resource Center Community and held once a month. The chat conversations will be visible to all members logged on the VRC site.
- **Small group (2-3) chat sessions:** These chat sessions will be an hour long and by appointment only. They will be open to only (2-3) Vaccine Resource Center Community Members at a time. You will be able to schedule a small group chat using the calendar below.
- **One-on-One chat sessions:** These chat sessions will typically last 20 minutes and be by appointment only. They will only be open to (1) Vaccine Resource Center Community Member at a time. You will be able to schedule a small group chat using the calendar below.

When interacting in these chats, please keep in mind the [site expectations](#) and be considerate to other users and moderators. As always, if you feel someone isn't following site expectations or is simply making you uncomfortable, please [contact us](#). For technical assistance, call (303) 614-1915 or email [vaccineresourcecenter@kp.org](mailto:vaccineresourcecenter@kp.org)

**Expert Chat**

Active Users

Type your message here

0/450

**SUPPLEMENTAL FIGURE 9**

Colorado VSM study Web site visuals from September 2013 to December 2016. Interactive page: Chat with an expert.



Here for your child's health, day and night.

---

Home
All About Vaccines
Your Vaccine Visit
Connect
FAQs
About Us
Contact Us

---

## Talk with Other Parents

Home / Connect / Talk with Other Parents

---

Connect

Website Expectations

Ask a Question

Blog

Chat With an Expert

Talk with Other Parents

## Welcome!

This is a space to talk with fellow parents and the Vaccine Resource Center team.

We encourage you to get involved by:

- Posting a topic for conversation about vaccines
- Asking a question you'd like to discuss
- Commenting on other questions and topics raised by fellow VRC members and the VRC team.

When commenting, please keep in mind the [site expectations](#) and be considerate to other users and moderators.

As always, if you feel someone isn't following site expectations or is simply making you uncomfortable, please [contact us](#).

---

  
**Ask a Question**

  
**Talk to Parents**

---

Popular



**Back to School: CO Vaccination Rates**  
July 28th, 2016



**Part II: Top 10 Flu Vaccine Questions and Answers**  
October 8th, 2015



**Top 10 Flu Vaccine Questions and Answers**  
October 1st, 2015

 Search

New/Recently Updated Topics

Select Forum

Advanced Search

Home
Talk with Other Parents
0 topics with unread posts

---

**Expectant Parents and Parents**
 Group RSS

Welcome

Topics 0  
Posts 0

No Topics

---

**Chat with an Expert Q and A's from Feb. 29, 2016**

Check out this forum to see the Questions and Comments we received from Moms and Moms-to-Be during our second Chat with an Expert. Feel free to add your own comments and questions!

Topics 4  
Posts 4

Last Post VRC\_Courtney  
Question 4: Do Vaccine Trials Record Every Outcome after a Vaccine Even if the Outcome is Not Related to a Vaccine?  
1 year ago

---

**Chat with an Expert Q and A's from Jan. 19, 2016**

Check out this forum to see the Questions and Comments we received from Moms and Moms-to-Be during our second Chat with an Expert. Feel free to add your own comments and questions!

Topics 6  
Posts 6

Last Post VRC\_Courtney  
Question 7: Can You Get a Thimerosal Free Flu Vaccine?  
1 year ago

---

**Chat with an Expert Q and A's from Nov. 19, 2015**

Check out this forum to see the Questions and Comments we received from Moms and Moms-to-Be during our second Chat with an Expert. Feel free to add your own comments and questions!

Topics 7  
Posts 7

Last Post VRC\_Courtney  
Question 7: Is Pertussis (Whooping Cough) a life threatening disease?  
2 years ago

**SUPPLEMENTAL FIGURE 10**

Colorado VSM study Web site visuals from September 2013 to December 2016. Interactive page: Discussion forum.

Site Expectations
My Profile | Log out



Here for your child's health, day and night.

Search ...

---

Home
All About Vaccines
Your Vaccine Visit
Connect
FAQs
About Us
Contact Us

---

Blog
Home / Blog

---



**Back to School: CO Vaccination Rates**  
As summer winds down in CO and families get [...]

---

July 28th, 2016 | Open Mic | 0 Comments Read More >



**New Colorado Vaccine Exemption Rule Took Effect 7/1/16**  
In April 2014, the Colorado House and Senate passed [...]

---

July 12th, 2016 | Hot off the Press | 0 Comments Read More >



**You Asked Us: How Effective is Rotavirus Vaccine?**  
Q: Hi, I had a question about the rotavirus [...]

---

June 21st, 2016 | Vaccine 101 | 0 Comments Read More >



**Vaccine Ingredient Spotlight: Fetal Cells**  
Question: Why are some vaccines, such as the MMR, [...]




Ask a Question    Talk to Parents

Popular
Recent



Back to School: CO Vaccination Rates  
July 28th, 2016



Part II: Top 10 Flu Vaccine Questions and Answers  
October 8th, 2015



Top 10 Flu Vaccine Questions and Answers  
October 1st, 2015

Categories

- > Hot off the Press
- > Open Mic
- > Research: A Day in the Life
- > The Doctor Is In
- > Vaccine 101
- > Welcome

Archives

Archives

Select Month ▼

**SUPPLEMENTAL FIGURE 11**

Colorado VSM study Web site visuals from September 2013 to December 2016. Interactive page: Blog.

**SUPPLEMENTAL TABLE 7** Section 4: Hoffman's Template for Intervention Description and Replication (TIDieR) Checklist

| Item Number | Item                                                                                                                                                                                                                                                                                                                | Where Located                             |                       |
|-------------|---------------------------------------------------------------------------------------------------------------------------------------------------------------------------------------------------------------------------------------------------------------------------------------------------------------------|-------------------------------------------|-----------------------|
|             |                                                                                                                                                                                                                                                                                                                     | Primary Article (Page or Appendix Number) | Other (Details)       |
| 1           | Brief name: Provide the name or a phrase that describes the intervention.                                                                                                                                                                                                                                           | Pages 1 and 2                             | —                     |
| 2           | Why: Describe any rationale, theory, or goal of the elements essential to the intervention.                                                                                                                                                                                                                         | Page 3                                    | Supplement, section 2 |
| 3           | What materials: Describe any physical or informational materials used in the intervention, including those provided to participants or used in the intervention delivery or in the training of intervention providers. Provide information on where the materials can be accessed (such as online appendix or URL). | Pages 2 and 3                             | Supplement, section 3 |
| 4           | What procedures: Describe each of the procedure's activities and/or processes used in the intervention, including any enabling or support activities.                                                                                                                                                               | Pages 2 and 3                             | —                     |
| 5           | Who provided: For each category of intervention provider (such as psychologist or nursing assistant), describe their expertise, background, and any specific training given.                                                                                                                                        | Page 3                                    | —                     |
| 6           | How: Describe the modes of delivery (such as face to face or by some other mechanism, such as Internet or telephone) of the intervention and whether it was provided individually or in a group.                                                                                                                    | Pages 2 and 3                             | —                     |
| 7           | Where: Describe the type(s) of location(s) where the intervention occurred, including any necessary infrastructure or relevant features.                                                                                                                                                                            | Pages 2 and 3                             | —                     |
| 8           | When and how much: Describe the number of times the intervention was delivered and over what period of time, including the number of sessions, their schedule, and their duration, intensity, or dose.                                                                                                              | Pages 2–4                                 | —                     |
| 9           | Tailoring: If the intervention was planned to be personalized, titrated, or adapted, then describe what, why, when, and how.                                                                                                                                                                                        | Page 3                                    | —                     |
| 10          | Modifications: If the intervention was modified during the course of the study, describe the changes (what, why, when, and how).                                                                                                                                                                                    | —                                         | —                     |
| 11          | How well, planned: If the intervention adherence or fidelity was assessed, describe how, by whom, and if any strategies were used to maintain or improve fidelity; describe them.                                                                                                                                   | Page 3                                    | Supplement, section 4 |
| 12          | How well, actual: If intervention adherence or fidelity was assessed, describe the extent to which the intervention was delivered as planned.                                                                                                                                                                       | Page 4                                    | —                     |

—, not applicable.

## SECTION 5: WEB SITE MODERATION PROTOCOL

### Vaccine Resource Center

#### Social Media Monitoring Protocol for Web Site Activity: April 19, 2013

##### I. Overview

Staff and researchers associated with the Vaccine Resource Center Research Study will adhere to the guidelines herein while engaging with research participants and providers in the social media platforms on the Vaccine Resource Center Web site.

An important element of monitoring the site will be responsiveness; even if we can't get out a full-fledged response in our given time frame, we need to at least acknowledge the response and let the participants know we see them and will be in touch with them.

##### Mission

"The Vaccine Resource Center is dedicated to acting as a trusted and valuable resource for current and expecting parents. Designed with input from parents and physicians like you, the website aims to evolve with the needs of primary vaccine decision makers."

##### What You Can Expect

- Accurate, up-to-date information;
- A dedicated staff of experts who are ready to answer any vaccine-related questions; and
- A space to exchange thoughts and ideas about vaccines with other parents.

##### Goals and Objectives of Monitoring

1. We want to be alerted to both positive and negative comments made regarding vaccination, vaccines, and the medical and health community;
2. We want to respond thoughtfully and accurately to questions and inquiries made by our participants;
3. We want to respond to comments made by participants that are inaccurate or misleading;
4. We want to actively engage with our participant communities' needs and provide content they are interested in seeing; and
5. We want to track the trends or themes that emerge around vaccination to ensure we are staying current and fresh.

##### II. Usage Policy

The Vaccine Resource Center Comment Moderation Policy will be implemented as follows to maintain a safe and open online forum:

1. Automatic filtering system: There will be a Web site tool in place that will capture posts containing words found on a predesignated list. These posts should not appear on the Web site. The Vaccine Resource Center team will review these posts and contact the user author of the post to let him or her know the post has been filtered out because it is in violation of Web site guidelines;
2. Vaccine Resource Center Team review of comments: (see box for definition of review) The Vaccine Resource Center Team will review posted comments on an ongoing basis during weekdays from 9 AM to 5 PM; and
3. User-generated review: Users will be encouraged to contact the Vaccine Resource Center team if they see comments or posts they

believe to be in violation of the Web site guidelines.

4. Moderate: To accept or reject user-generated comments before they are posted on the basis of predetermined policies and guidelines.
5. Review: To allow or delete user-generated comments after they are posted on the basis of predetermined policies and guidelines.
6. Monitor: To observe user-generated comments for the purpose of gaining insights for the organization and identifying opportunities for response.

Below is a copy of the Commenting Expectations and Guidelines that will be posted on the Vaccine Resource Center Web site and shared in a pdf document via e-mail with new site registrants.

##### Vaccine Resource Center: Commenting Expectations and Guidelines (as Printed on the Web Site and in the Study Consent Form)

Our goal is for this site to be a safe space to discuss a wide range of topics and questions that parents come across while making vaccination decisions for their children. We encourage you to share your thoughts as they relate to the topic being discussed. We believe this site should be a safe community space, and we will review and moderate comments according to the guidelines below. The following guidelines refer to comments users post on the Web site, and we reserve the right to remove posts that do not follow our policy.

Please do

- Treat others with respect;
- Keep your posts relevant and civil;
- Share information or questions you have on a topic;

- Feel comfortable expressing your views even if they are not the same as other commenters; and
- Make the Vaccine Resource Center staff aware of any comments that you find offensive or detracts from the goal of safe and open discussion.

Please do not

- Post false comments about a person or organization. False comments can damage the reputation of a person or organization;
- Post messages that use harassing, false, abusive, threatening, harmful, bad (curse words), sexually oriented, homophobic, or racially offensive language;
- Use spamming or flooding. Don't repost the same message or similar messages more than once; and
- Use personal information. Although our Web site is restricted to people participating in this project and the Web site is not available to the general public, we ask that you not publicize your or anyone else's (including your Kaiser Permanente provider's) contact details, including address, place of employment, name of educational establishment, telephone or mobile number, e-mail address, etc. This is for your own safety and that of everyone who uses this service.

### **Maintaining a Safe and Open Online Forum**

To maintain a safe and open forum for conversation, we will remove comments that:

- Contain sexually oriented, inappropriate, or bad (curse words) language;
- Contain threats or false statements;
- Contain hate speech directed at race, color, sex, sexual orientation,

national origin, ethnicity, age, religion, or disability; or

- Promote or endorse services or products (note that noncommercial links that are relevant to the topic or another comment are acceptable.); and
- Contain personal information, including your or anyone else's (including your Kaiser Permanente provider's) contact details, including address, place of employment, name of educational establishment, telephone or mobile number, e-mail address, etc.

We will monitor future posts from any person who violates these expectations. If the behavior continues, this may lead to temporary or permanent suspension of your ability to post on the Web site. If this occurs, the participant will continue to have access to the Web site information. Any threats made on the Web site to oneself or others will result in immediate removal of access to the Web site.

Comments or posts to the Web site will be held for review if they contain any key words that we have deemed inappropriate. These posts will be reviewed by Vaccine Resource Center staff before being posted to the Web site. Comments that do not contain any key words will automatically post to the site. Users will always have the ability to report a comment for review by a Vaccine Resource Center moderator if they believe the content of the comment violates the Web site expectations detailed above.

### **Reporting a Comment**

You have the right to report a comment for Vaccine Resource Center moderator review. Please think carefully about what you choose to report, and do not misuse the reporting system. It exists to help users tell the moderators about content that breaks the above rules. Please do not use the reporting

system to tell us about multiple postings, spelling mistakes, or an opinion that simply differs from your own. Anyone who misuses the reporting system repeatedly may have his or her account suspended.

### **Disclaimer About Individual Medical Advice**

The Vaccine Resource Center will be able to answer general vaccination questions, but you should refer to your doctor to answer specific questions about your child. The Vaccine Resource Center does not have all the information necessary to give specific medical advice about your child. If a specific question is asked, we will refer you back to your physician. Likewise, if you are experiencing any health-related issues with your child, please contact your health care provider immediately.

### **Example of Question the Vaccine Resource Center can Answer**

“My child is due for the chicken pox vaccine. What vaccine does Kaiser Permanente give for chicken pox?”

### **Example of Question for Which We Would Refer You Back to Your Doctor**

“My child has a history of febrile seizures, should I be concerned about my child getting vaccinated?”

### **Legal Requirement to Report**

If a participant suggests or threatens harm to oneself, other study participants, study personnel, Kaiser Permanente employees, or others, the research staff will report the threat to appropriate authorities.

### **Copyright**

Copyrighted and other proprietary material should not be posted

or submitted in any form unless permission to do so is clearly indicated. By participating in the Vaccine Resource Center Web site study, all of your posted comments or other work can only be used by the research team for study purposes. For example, we may choose to display your comments in a research article or presentation. However, your identity will never be displayed or linked to your comments.

### **Moderation Times**

We recognize that the Internet is a medium unbound by regular business hours, and your comments are welcome at any time. However, given staff resources, Vaccine Resource Center reviewing and posting of comments will occur during regular business hours (9 AM–5 PM) Monday through Friday. Comments submitted at other times will be reviewed and posted as soon as possible the next business day.

### **Privacy**

To protect your privacy, please do not include personal information for yourself, your family, or your Kaiser Permanente providers (eg, names, e-mail address, or phone number) in the text of your comment that identifies you.

Additional guidance as to how the Vaccine Resource Center regards privacy issues can be found within our Privacy and Security Notice.

Thank you for taking the time to read this comment policy. We encourage your participation in our discussion and look forward to an active exchange of ideas.

### **Social Media Tools**

#### *Blog*

Blog entries will be posted by the Vaccine Resource Center research

staff. Blog topics will cover vaccine effectiveness, vaccine safety, new vaccine research studies, changes in immunization recommendations, alternative vaccine schedules, and other timely topics. It will feature an interactive format in which participants can post comments on the latest blog entry. Blog topics will be searchable through the Web site's search engine and through topic category.

#### *Discussion Board*

A forum in which participants can discuss any vaccine-related topic through posted messages will be present. Topics (threads) can be started by participants or research staff. The board will be moderated by the research staff. Threads will also be searchable through the Web site's search engine.

#### *Ask a Question*

For participants who are not comfortable communicating in the chat room or on discussion boards, we will provide a mechanism by which they can privately submit questions. Our goal will be to answer these questions within a 24-hour period or the next business day. The Vaccine Resource Center team member responsible for responding to questions will never give patient-specific medical advice. The Vaccine Resource Center team member gives the users information so they are better informed when they next meet with their health care team or helps them understand complex information.

#### *Chat With an Expert*

A number of different vaccine-related experts will lead 1-hour live discussions each week. Participants will be able to login to the Web site and ask the experts any vaccine-related question. We will poll participants during the first 6 months of recruitment to determine the time and day of the chat sessions. The

expert will never give patient-specific medical advice. The expert gives the users information so they are better informed when they next meet with their health care team or helps them understand complex information.

### **III. Tracking**

There are a number of social media tools the Vaccine Resource Center is using to interact with expecting mothers about vaccination. The tools are listed below with a brief explanation of their intended usage and general monitoring schedule.

#### *Blog*

Blog entries will be posted by the research staff. Blog topics will cover vaccine effectiveness, vaccine safety, new vaccine research studies, changes in immunization recommendations, alternative vaccine schedules, and other timely topics. It will feature an interactive format in which participants can post comments on the latest blog entry. Blog topics will be searchable through the Web site's search engine. The blog will be monitored each weekday between 9 AM and 5 PM at least twice a day.

#### *Discussion Board*

A forum in which participants can discuss any vaccine-related topic through posted messages will be present. Topics (threads) can be started by participants or research staff. The board will be moderated by the research staff. Threads will also be searchable through the Web site's search engine. The discussion board will be monitored each weekday between 9 AM and 5 PM at least twice a day.

#### *Ask a Question*

For participants who are not comfortable communicating in the



chat room or on discussion boards, we will provide a mechanism by which they can privately submit questions. Our goal will be to answer these questions within a 24-hour period or the next business day. Ask a Question will be monitored each weekday between 9 AM and 5 PM at least twice a day.

#### *Chat With an Expert*

A number of different vaccine-related experts will lead 1-hour live discussions each week. Participants will be able to login to the Web site and ask the experts any vaccine-related question. We will poll participants during the first 6 months of recruitment to determine the time and day of the chat sessions. The expert will never give patient-specific medical advice. The expert gives the users information so they are better informed when they next meet with their health care team or helps them understand complex information. Chat with an Expert will be monitored weekly on the basis of the scheduling of the 1-hour live discussion.

In addition to the social media components, there are a number of statistics and user information we will be monitoring over the course of the project. The tools to track this information are listed below.

#### *Tracking Schedule*

The Vaccine Resource Center Web site will be monitored by research staff members Monday through Friday between the hours of 9 AM and 5 PM. Participants will be made aware that the Web site will not be actively monitored on weeknights after 5 PM and on weekends and to expect some delay in response during those time periods. They will be encouraged to report any uncomfortable or negative commentary made or actions during these hours to our Report Conduct area on the site.

**SUPPLEMENTAL TABLE 8** Monitoring Shifts

|                  | Morning                  | Afternoon                | Late Afternoon           |
|------------------|--------------------------|--------------------------|--------------------------|
| Blog             | Checked for new activity | Checked for new activity | Checked for new activity |
|                  | Respond to comments      | Respond to comments      | Respond to comments      |
|                  | Answer questions         | Answer questions         | Answer questions         |
| Discussion board | Checked for new activity | Checked for new activity | Checked for new activity |
|                  | Respond to comments      | Respond to comments      | Respond to comments      |
| Ask a question   | Checked for new activity | Checked for new activity | Checked for new activity |

#### **IV. Proactive and Reactive Activities**

There are 2 types of communication we will engage in with participants of the Vaccine Resource Center research study: proactive (new content announcements, new blog entries, updates and reminders; and changes in expert chat schedule) and reactive (acknowledge and/or respond to an issue or concern, respond to a complaint, respond to questions and inquiries, post factual information when inaccurate or misleading information has been posted, direct a participant to the best resource, inform participants that they're in violation of our policies, inform participants that they will be put on restricted usage, and inform participants that they are no longer welcome).

#### **V. Engagement Guidelines**

Engagement guidelines can be broken down into 3 categories: classification, engagement process, and engagement response qualities.

##### *Classification*

Classifying user-generated content into general categories will help social media staff determine how to manage comments, whether to engage online, and how to craft responses. Depending on the comment control features of a particular social media channel, the team will manage content in 1 of 3 ways:

- **Moderate:** accept or reject user-generated comments before they are posted on the basis of predetermined policies and guidelines;
- **Review:** allow or delete user-generated comments after they are posted on the basis of predetermined policies and guidelines; or
- **Monitor:** observe user-generated comments for the purpose of gaining insights for the organization and identifying opportunities for response.

##### *Level Green Content*

Content generally does not warrant a response or seem to be looking for a response. They will post to the Web site immediately without approval. This includes compliments and thanks.

##### *Level Blue Content*

Content is immediately posted to the Web site without approval and does not necessarily need to be removed from the site; it may require response. This includes off-topic comments (not related to vaccination) and individual Web site or study requests (eg, participant asks for help in posting to a forum, logging in, etc.).

##### *Level Yellow Content*

Content is immediately posted to the Web site without approval and requires a response from the research staff. This includes complaints or problems, inaccurate information, questions or direct inquiries, and comments or questions

that relate to a participant's personal health or infant's health.

*Level Orange Content: May Be Reported to Institutional Review Board as Adverse Events*

Content is immediately posted to the Web site without approval and needs to be removed from Web site. This includes language that is bullying in tone (reportable), violent language (reportable), personal identifying information (name, contact information, or child's name; not reportable), and spamming or flooding (not reportable).

*Level Red Content: Reported to Institutional Review Board as Adverse Events*

Content immediately violates Web site policy and is filtered through security, reviewed by research staff, deemed inappropriate, and in most cases, will never appear on the site. This includes bad language and obscenities and names of Kaiser Permanente doctors.

*Level Purple Content: Report to Institutional Review Board Immediately and Contact Designated Study Team Members*

Content is immediately posted to the Web site without approval and needs to be removed from Web site. This includes language that is threatening to other participants, the research team, oneself, or Kaiser Permanente staff.

*Engagement Response Qualities:*

All responses and feedback to our participants should follow these style guidelines:

- **Transparency:** Initial responses should disclose that you are a member of the Vaccine Resource Center Team;
- **Tone:** Responses should be written in a friendly manner that demonstrates respect for the participant as well as other members of the Vaccine Resource Center community. Do not engage participants in an argumentative tone if you do not agree with what they have posted;
- **Linking:** If relevant, provide page links to the area of the site where a respondent can find more information on a topic;
- **Accuracy:** Responses should be double-checked for misspellings and broken hyperlinks. Additionally, content accuracy is of utmost importance, so before answering any question, double-check with the appropriate staff member or expert; and
- **Cite:** Cite your sources of information when answering factual questions.

Here are steps for engaging with participant posts:

1. Carefully read the contents of a comment to determine which kind of comment category it falls under;

2. Based on content, choose an appropriate response on the basis of the classification system above;
3. Who responds: All Vaccine Resource Center staff are responsible for taking part in the weekday (9 AM–5 PM) monitoring of the interactive components on the Web site. Vaccine Resource Center staff members will respond to participant comments, questions, and posts through a number of methods, which will be dependent on the category level of the post detailed in the chart above; and
4. Before posting a response, double-check to make sure it fits the following comment rules:
  - a. Did you disclose that you are a member of Vaccine Resource Center team?
  - b. Did you respond in a positive and respectful manner? Have another team member read your post if you are at all concerned about the content tone.
  - c. Did you link to site information that would help correct the information posted if the classification called for it? Did you check the link to make sure it works?
  - d. Did you double-check for spelling and grammatical mistakes? Did you get feedback from the appropriate content expert on this topic?
  - e. Did you cite your sources if you provided unoriginal content?

**SUPPLEMENTAL TABLE 9** Engagement Process

| Category, Level                                                                                                                                                                               | What to Say                                                                                                                                                                                                                                         | What to Do                                                                                                                                                                                                                                                        | Who Responds                                                                                                                                                                                                                             |
|-----------------------------------------------------------------------------------------------------------------------------------------------------------------------------------------------|-----------------------------------------------------------------------------------------------------------------------------------------------------------------------------------------------------------------------------------------------------|-------------------------------------------------------------------------------------------------------------------------------------------------------------------------------------------------------------------------------------------------------------------|------------------------------------------------------------------------------------------------------------------------------------------------------------------------------------------------------------------------------------------|
| Green<br>Neutral or benign comments                                                                                                                                                           | Express thanks as appropriate                                                                                                                                                                                                                       | User content posts immediately without approval, is simply monitored, and left alone                                                                                                                                                                              | Any research staff member responsible for content monitoring                                                                                                                                                                             |
| Blue<br>Individual Web site or study requests<br>Off-topic remarks                                                                                                                            | Send a standard response to user; inform them that the comments are appreciated but best left to a different venue                                                                                                                                  | User content posts immediately without approval, is reviewed and rejected by staff on a case-by-case basis, requires direct response to user                                                                                                                      | Any research staff member responsible for content monitoring                                                                                                                                                                             |
| Yellow<br>Complaint or problem<br>Inaccurate information<br>Questions or direct inquiry<br>Comments or questions that relate to participant's personal health or infant's health <sup>b</sup> | Craft response from standard language and submit for approval before posting <sup>a</sup>                                                                                                                                                           | User content posts immediately without approval, is reviewed by staff, and requires response crafted by appropriate study team member <sup>a</sup>                                                                                                                | Research staff member responsible for content monitoring                                                                                                                                                                                 |
| Orange<br>Language that is bullying in tone<br>Violent language<br>Personal identifying information<br>Spamming or flooding                                                                   | User is informed via e-mail that he or she has violated the Web site rules and that future posts will be reviewed; if user attempts to continue posting offensive content, the third violation will result in being banned from posting on the site | User content posts immediately without approval, is reviewed by staff, rejected and removed from site by staff, and requires response crafted by appropriate study team member <sup>a</sup>                                                                       | Research staff member responsible for content monitoring, may require leadership feedback before sending out violation e-mail                                                                                                            |
| Red<br>Bad language or obscenities<br>Names of Kaiser Permanente doctors                                                                                                                      | User is informed via e-mail that he or she has violated the Web site rules and that future posts will be reviewed; if user attempts to continue posting offensive content, the third violation will result in being banned from posting on the site | User content is not posted, must be moderated and rejected; user is notified that the content violated Web site rules                                                                                                                                             | Research staff member responsible for content monitoring, may require leadership feedback before sending out violation e-mail                                                                                                            |
| Purple<br>Language that is threatening to other participants, research team members, Kaiser Permanente staff members, or oneself                                                              | Users are informed via e-mail that they have violated the Web site rules and that their participation in the study is over. We will also inform them that the appropriate legal authorities are being contacted                                     | User content posts immediately without approval, is reviewed by staff, rejected and removed from site by staff and requires immediate action by staff member. Must report to staff member pediatrician. Must report to the institutional review board immediately | Posts will require the oversight or response of a designated staff member to deal with comments that violate site policy. Will report to Matt Daley or Liz Bayliss, who will file an official report based on Kaiser Permanente policies |

The social media team will moderate, review, or monitor user-generated content and respond on the basis of the content categories and medium in which the content is submitted.

<sup>a</sup> Determine if subject matter requires expert or leadership feedback.

<sup>b</sup> Use standard language to inform users that they need to seek advice from their own medical provider.

**SUPPLEMENTAL TABLE 10** Appropriate Procedures for Content Levels

| Content Level                                                                                              | Procedure                                                                                                                                                                                                                                                                                                                                                                                                                         |
|------------------------------------------------------------------------------------------------------------|-----------------------------------------------------------------------------------------------------------------------------------------------------------------------------------------------------------------------------------------------------------------------------------------------------------------------------------------------------------------------------------------------------------------------------------|
| Purple <sup>a</sup>                                                                                        | Who responds                                                                                                                                                                                                                                                                                                                                                                                                                      |
| Language that is threatening to other participants, the research team, oneself, or Kaiser Permanente staff | Posts will require the oversight or response of a designated staff member to deal with comments that violate site policy.                                                                                                                                                                                                                                                                                                         |
|                                                                                                            | Procedure                                                                                                                                                                                                                                                                                                                                                                                                                         |
|                                                                                                            | On the first business day (a Monday if the comment came in over the weekend) that we receive a level purple comment, we will contact the team member pediatrician or Liz Bayliss, who will file an official report with authorities based on Kaiser Permanente policy and protocol.                                                                                                                                               |
|                                                                                                            | Study participant will be removed from the study. Users are informed via e-mail that they have violated the Web site rules and that their participation in the study is over. We will also inform them that the appropriate legal authorities are being contacted.                                                                                                                                                                |
| Red <sup>b</sup>                                                                                           | Who responds                                                                                                                                                                                                                                                                                                                                                                                                                      |
| Bad language                                                                                               | Posts will require the oversight or response of a designated staff member to deal with comments that violate site policy.                                                                                                                                                                                                                                                                                                         |
| Names of Kaiser Permanente doctors                                                                         | Procedure                                                                                                                                                                                                                                                                                                                                                                                                                         |
|                                                                                                            | On the first business day (a Monday if the comment came in over the weekend) that we receive an alert that a level red comment was filtered from the system, we will contact the staff member overseeing site abuse issues.                                                                                                                                                                                                       |
|                                                                                                            | We will e-mail the participants who posted level red comments with a standard e-mail response detailing which Web site guideline or rule they have violated and let them know which number of warning they are receiving (first, second, or third) and what that means for their continued use of social media on the Web site.                                                                                                   |
| Orange <sup>b</sup>                                                                                        | Who responds                                                                                                                                                                                                                                                                                                                                                                                                                      |
| Language that is bullying in tone                                                                          | Posts will require the oversight or response of a designated staff member to deal with comments that violate site policy.                                                                                                                                                                                                                                                                                                         |
| Violent language                                                                                           | Procedure                                                                                                                                                                                                                                                                                                                                                                                                                         |
| Personal identifying information                                                                           | On the first business day (a Monday if the comment came in over the weekend) that we receive a level orange comment, we will contact the staff member overseeing site abuse issues.                                                                                                                                                                                                                                               |
| Spamming or flooding                                                                                       | We will e-mail the participants who posted level orange comments with a standard e-mail response detailing which Web site guideline or rule they have violated and let them know which number of warning they are receiving (first, second, or third) and what that means for their continued use of social media on the Web site                                                                                                 |
| Yellow                                                                                                     | Who responds                                                                                                                                                                                                                                                                                                                                                                                                                      |
| Complaint or problem                                                                                       | Posts will call for the oversight or response of a staff expert.                                                                                                                                                                                                                                                                                                                                                                  |
| Inaccurate information                                                                                     | Procedure                                                                                                                                                                                                                                                                                                                                                                                                                         |
| Question or direct inquiry                                                                                 | On the first business day (a Monday if the comment came in over the weekend) that we receive a level yellow comment or question, we will contact each of our staff experts to craft a response to a specific comment or question.                                                                                                                                                                                                 |
| Comments or questions that relate to participant's personal health or infant's health                      | On the same business day as we contact staff experts we will respond to the comment or question with an acknowledgement statement that lets the participant know we saw the post and we are working on a response                                                                                                                                                                                                                 |
| Blue                                                                                                       | Who responds                                                                                                                                                                                                                                                                                                                                                                                                                      |
| Individual Web site or study requests                                                                      | Posts will require a response from the staff member in charge of a given monitoring shift.                                                                                                                                                                                                                                                                                                                                        |
| Off-topic remarks                                                                                          | Procedure                                                                                                                                                                                                                                                                                                                                                                                                                         |
|                                                                                                            | On the first business day (a Monday if the comment came in over the weekend) that we receive a level blue comment or question, we will reply to the participant with a predefined standard response based on the nature of the comment. Eg, a participant posts a message that is off topic; we will have a standard response that lets him or her know it is off topic.                                                          |
| Green                                                                                                      | Who responds                                                                                                                                                                                                                                                                                                                                                                                                                      |
| Neutral or benign comments                                                                                 | Posts may or may not be responded to by the staff member in charge of a given monitoring shift.                                                                                                                                                                                                                                                                                                                                   |
|                                                                                                            | Procedure                                                                                                                                                                                                                                                                                                                                                                                                                         |
|                                                                                                            | On the first business day (a Monday if the comment came in over the weekend) that we receive a level green comment, we may or may not reply with a predefined standard response based on the nature of the comment. Eg, A participant posts that a particular blog was informative and helped him or her make a vaccine decision; we may or may not reply with a standard response thanking him or her for the positive feedback. |

<sup>a</sup> Language that threatens either the participant, other participants, and/or Kaiser Permanente staff members is to be reported to the institutional review board immediately.

<sup>b</sup> Reported to the institutional review board under adverse events.

**SUPPLEMENTAL REFERENCES**

39. Hoddinott SN, Bass MJ. The Dillman total design survey method. *Can Fam Physician*. 1986;32:2366–2368

40. Dillman DA, Smyth JD, Christian LM. *Internet, Phone, Mail, and Mixed-Mode Surveys: The*

*Tailored Design Method*. Hoboken, NJ: John Wiley & Sons; 2014
